# Supplementary material for: Tobacco-specific nitrosamine 1-(N-methyl-N-nitrosamino)-1-(3-pyridinyl)-4-butanal (NNA) causes DNA damage and impaired replication/transcription in human lung cells
Source: PubMed Central journal article supplement (PMC9109921; doi:10.1371/journal.pone.0267839), 2022-05-16
Supplement: pone.0267839.s004.pdf [file pone.0267839.s004.pdf]

**Figure 1A.** 9.4 kb fragment (long)

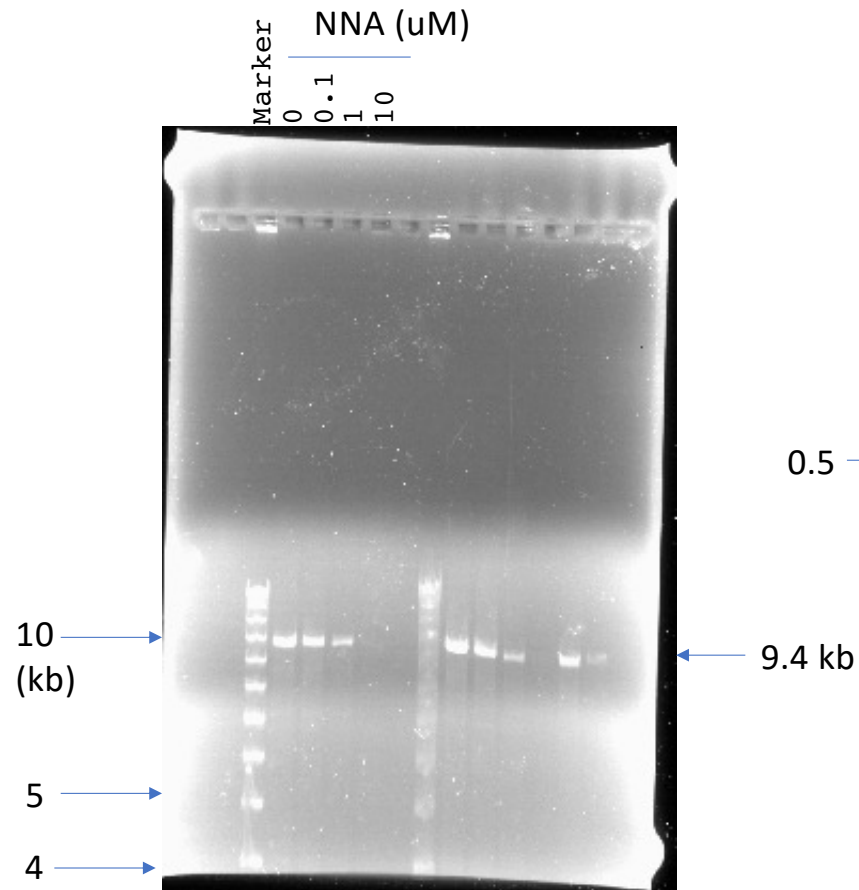

**Figure 1A.** 192 bp fragment (short)

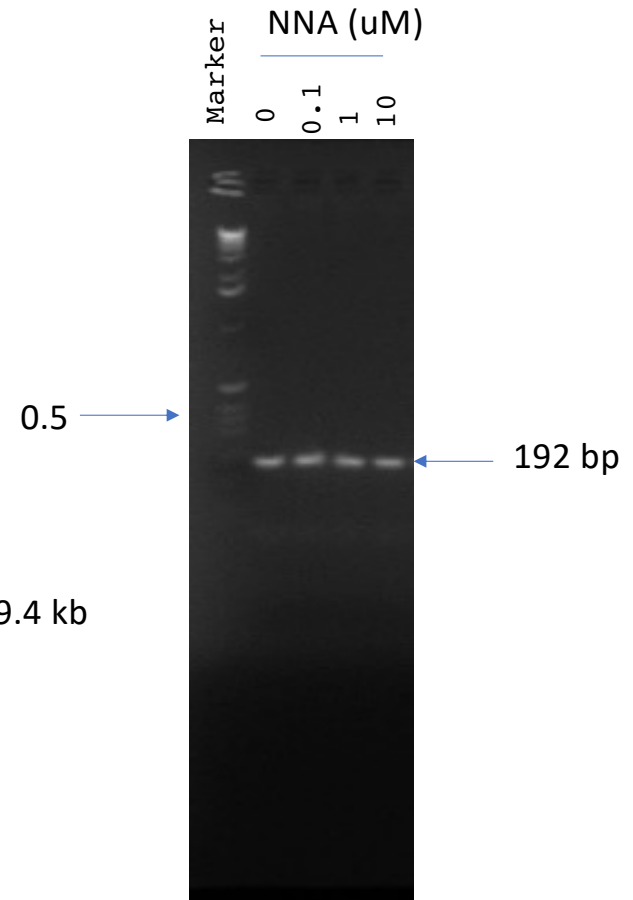

**Figure 1C.** 9.6 kb fragment

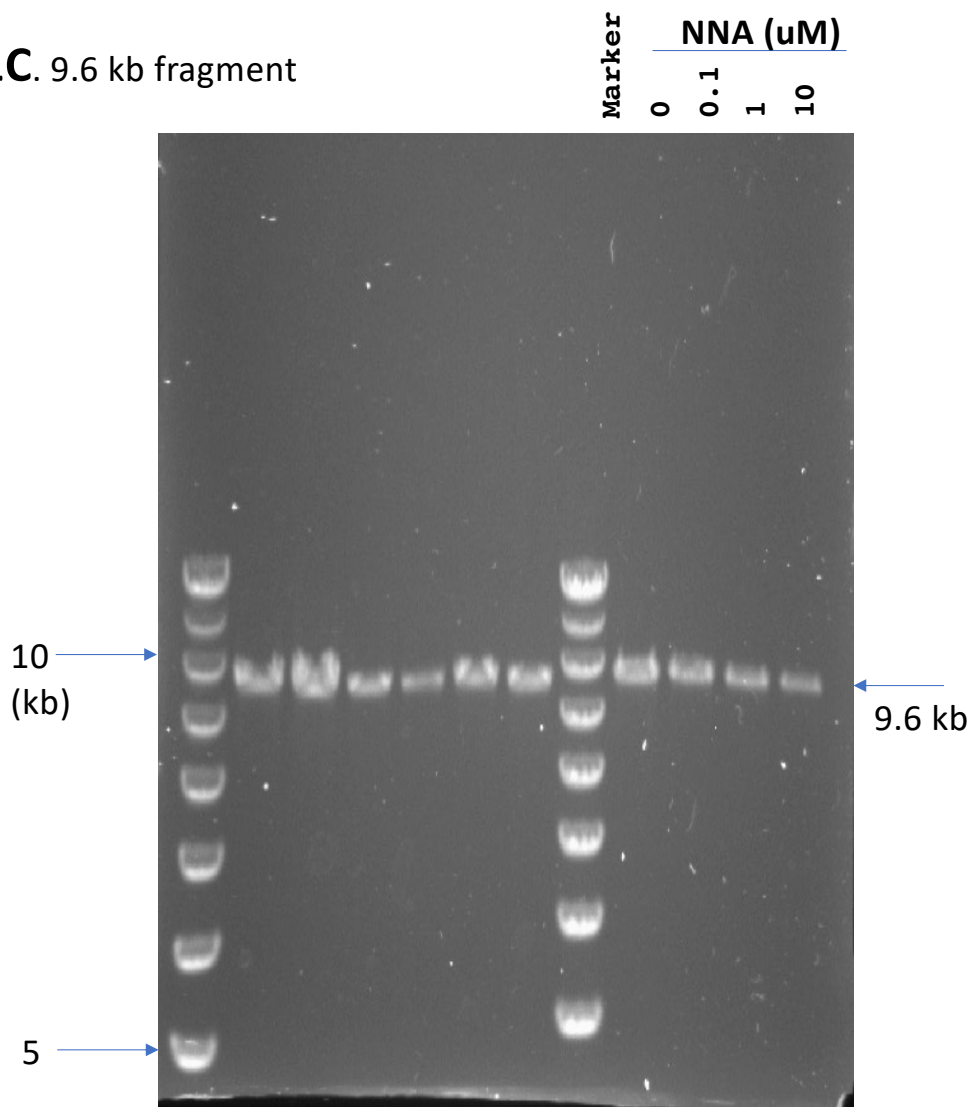

**Figure 1C.** 294 bp fragment

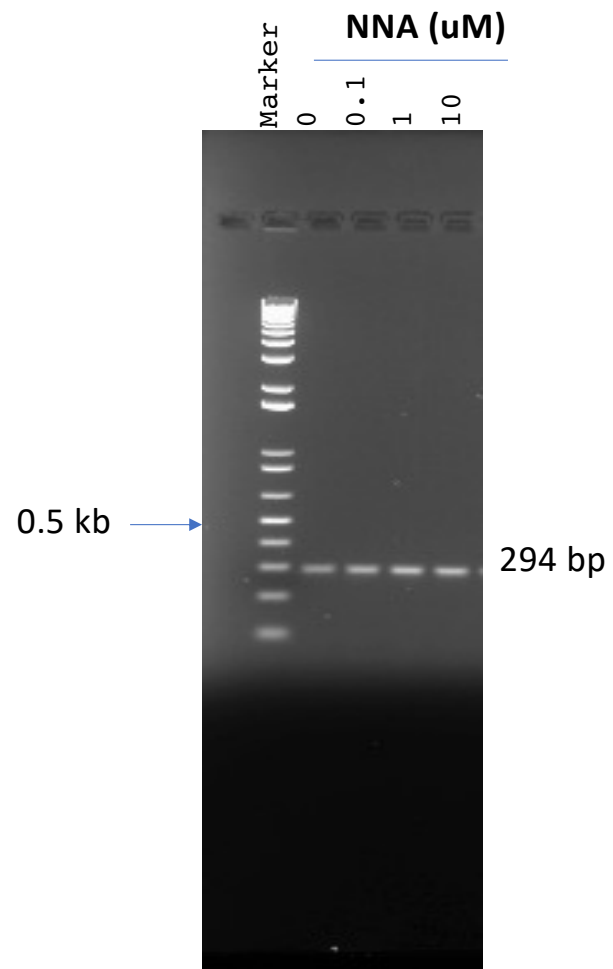

**Figure 2C.**

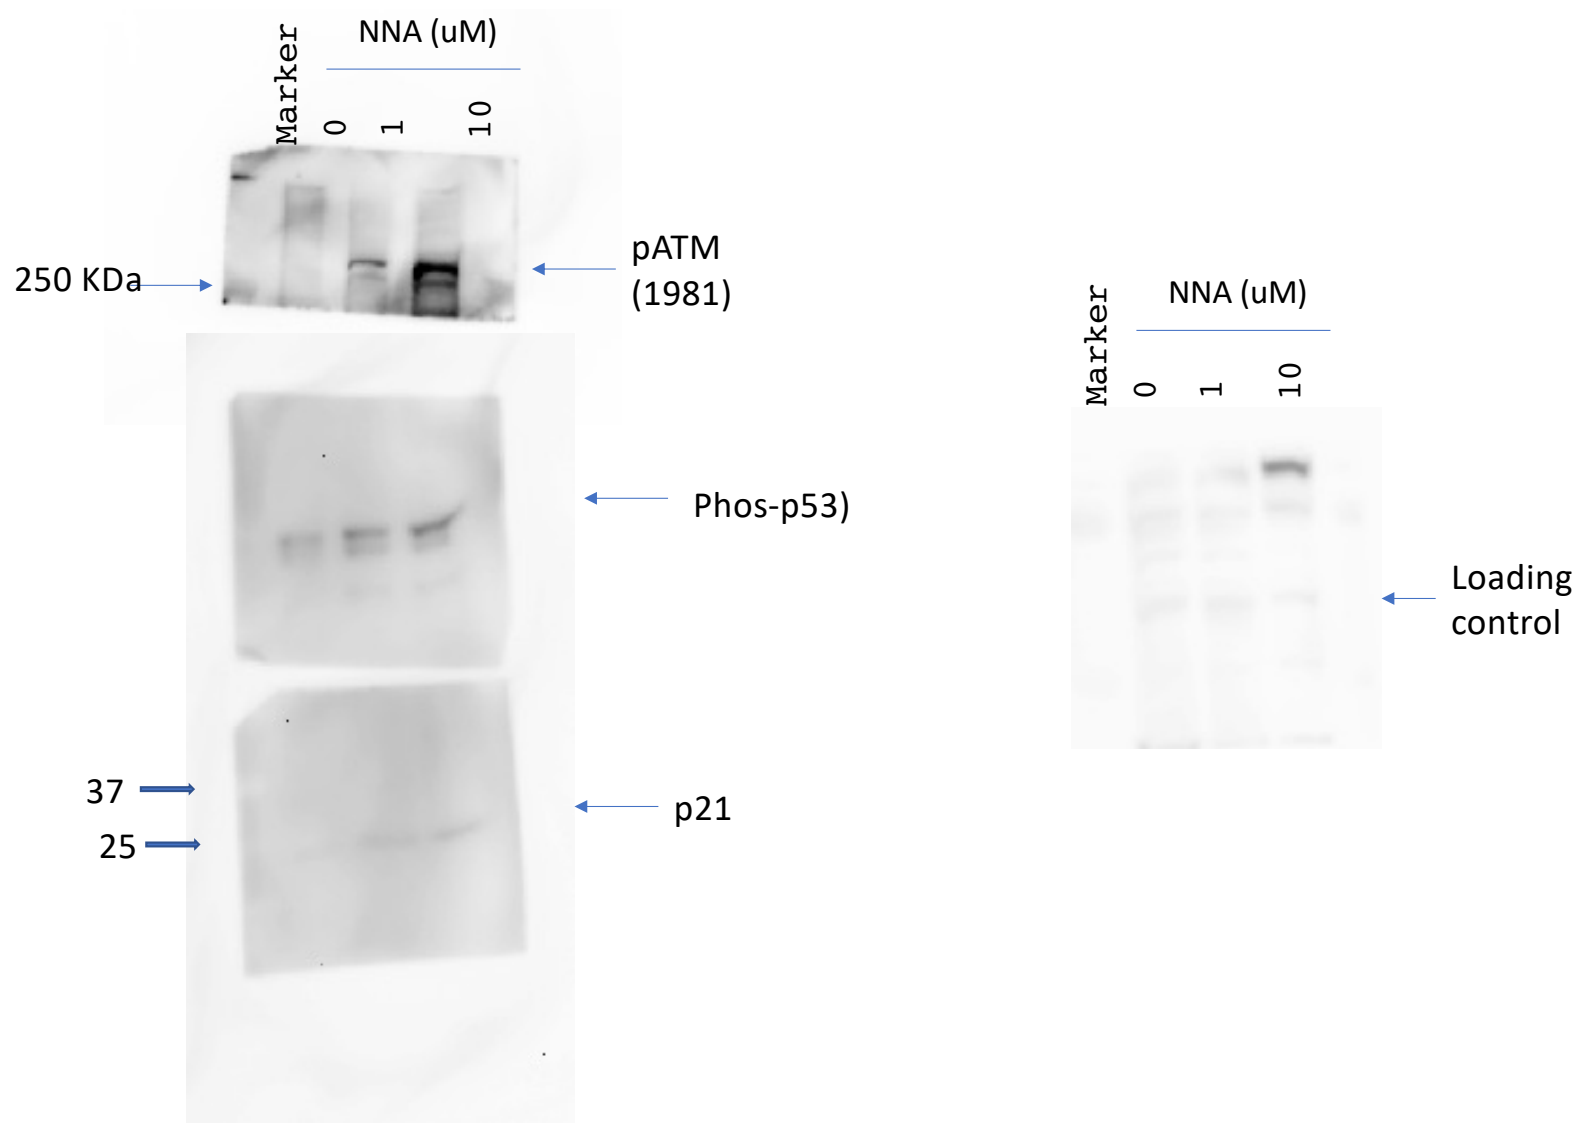



**Fig. S1**

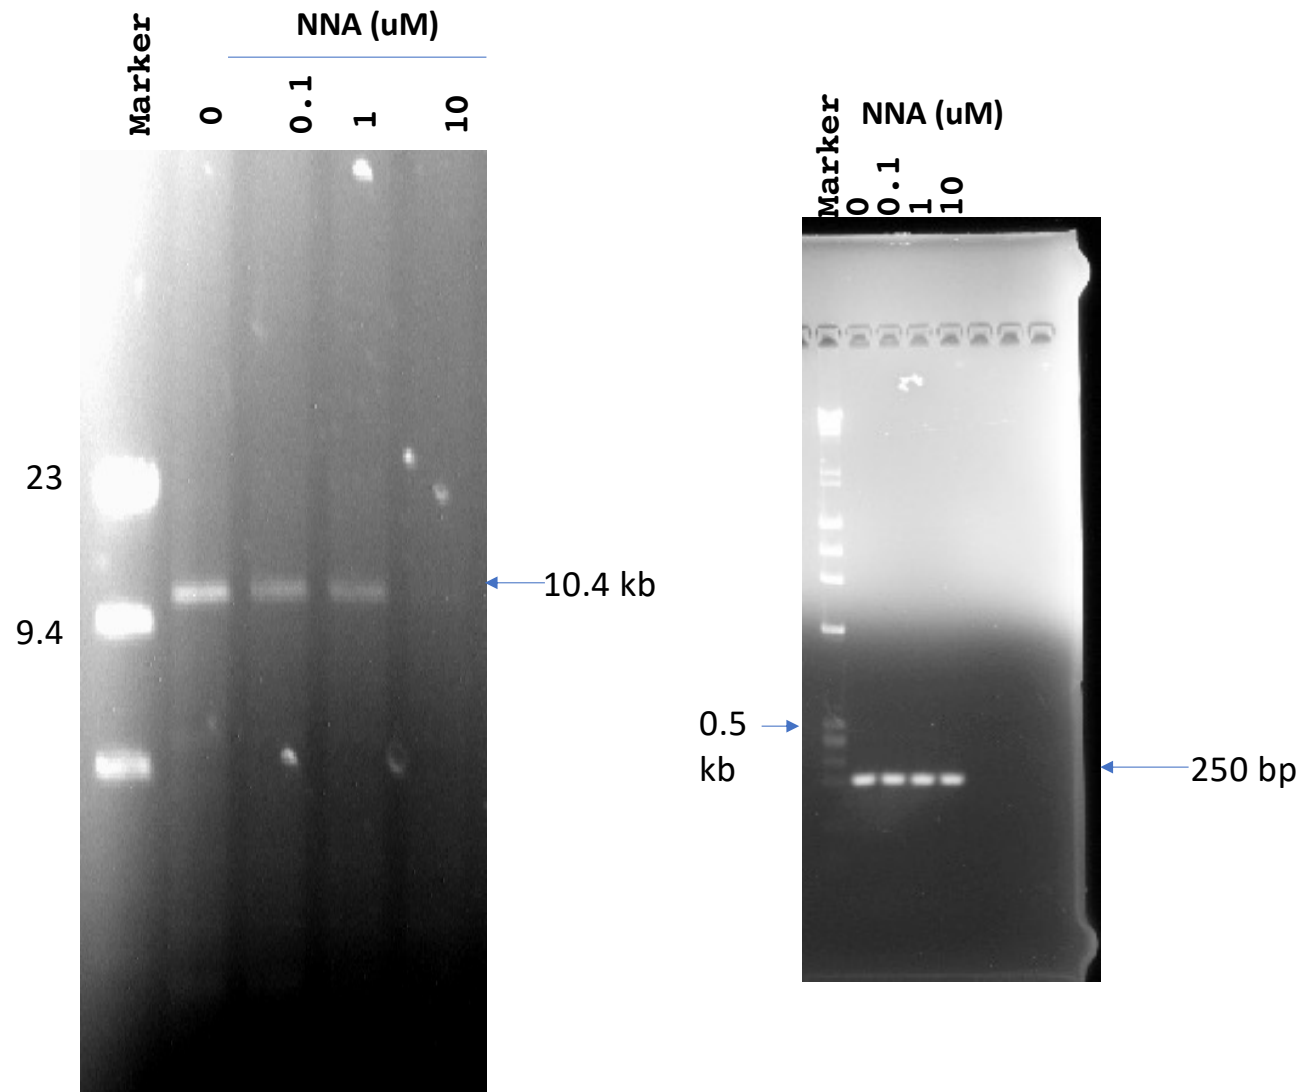

**Fig. S2**

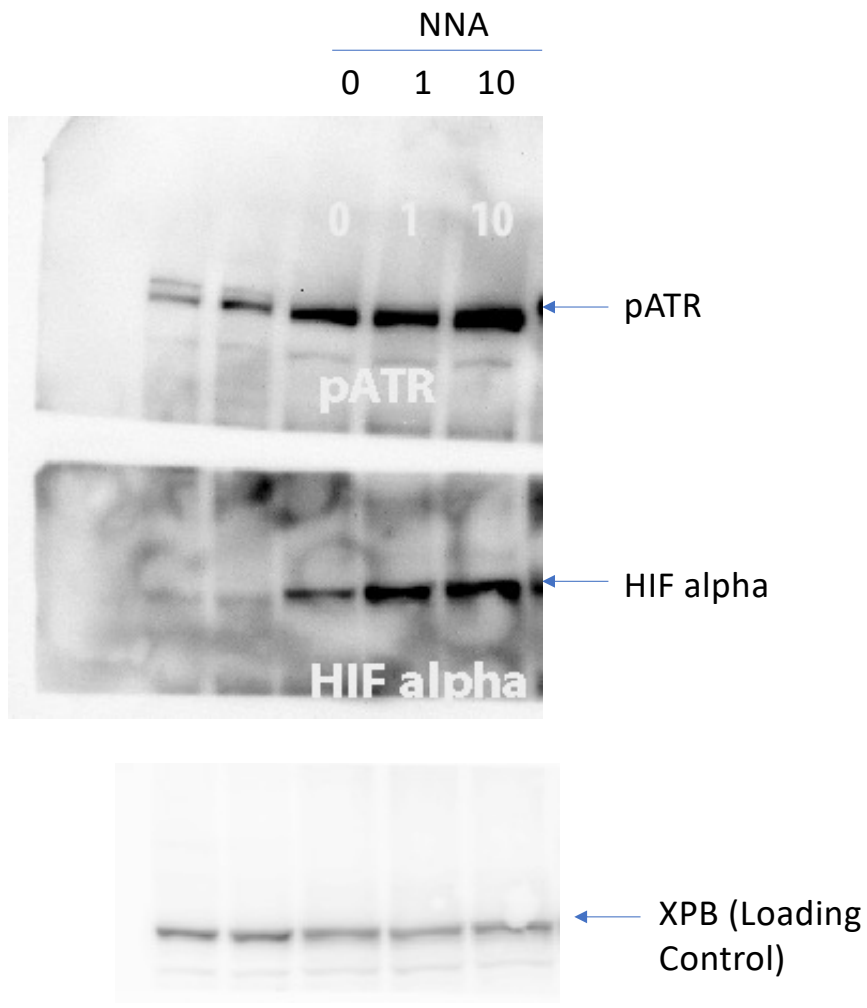

**Fig. S3**

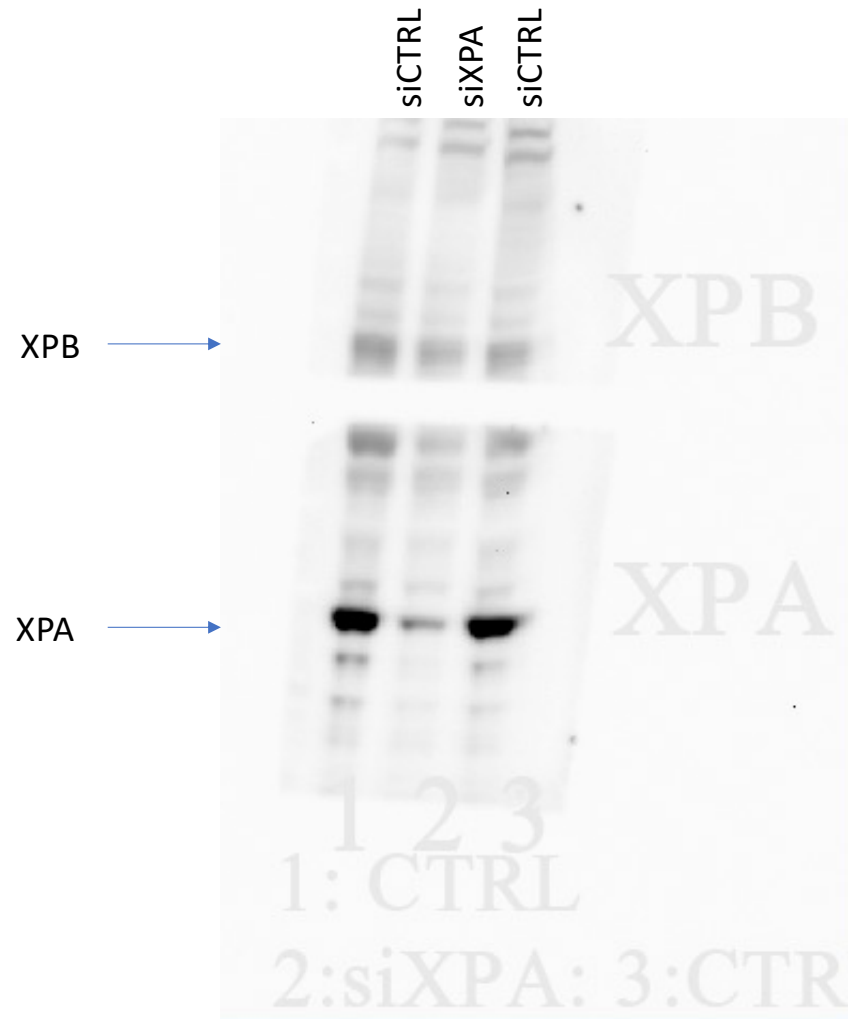

Lane 1# siControl  
Lane 2# siXPA  
Lane 3# siControl
